# Supplementary material for: Fructooligosaccharides act on the gut–bone axis to improve bone independent of Tregs and alter osteocytes in young adult C57BL/6 female mice
Source: PubMed Central journal article supplement — JBMR Plus. 2024 Feb 21;8(5):ziae021. doi: 10.1093/jbmrpl/ziae021 (PMC10982850; doi:10.1093/jbmrpl/ziae021), 2024-02-21

**Supplementary Table 1: Diet Formulation**

| Ingredients                               | Control Diet<br>(AIN-93M) | TC Diet<br>(10%) | FOS Diet<br>(10%) |
|-------------------------------------------|---------------------------|------------------|-------------------|
|                                           | (g/kg diet)               | (g/kg diet)      | (g/kg diet)       |
| <b>TC<sup>1</sup> or FOS</b>              | 0.0                       | 100.0            | 100.0             |
| <b>Carbohydrates</b>                      |                           |                  |                   |
| Cornstarch (g)                            | 465.7                     | 383.6            | 365.7             |
| Maltodextrin (g)                          | 155.0                     | 155.0            | 155.0             |
| Sucrose (g)                               | 100.0                     | 100.0            | 100.0             |
| TC (g)                                    | 0.0                       | 82.1             |                   |
| <b>Protein</b>                            |                           |                  |                   |
| Casein (g)                                | 140.0                     | 133.5            | 140.0             |
| TC (g)                                    | 0.0                       | 6.5              |                   |
| <b>Fat</b>                                |                           |                  |                   |
| Soybean oil (g)                           | 40.0                      | 39.4             | 40.0              |
| TC (g)                                    | 0.0                       | 0.59             |                   |
| <b>Fiber</b>                              |                           |                  |                   |
| Cellulose(g)                              | 50.0                      | 48.1             | 50.0              |
| TC (g)                                    | 0.0                       | 1.92             |                   |
| <b>Vitamin mix</b>                        | 10.0                      | 10.0             | 10.0              |
| <b>Mineral</b>                            |                           |                  |                   |
| Mineral mix <sup>2</sup>                  | 13.4                      | 13.4             | 13.4              |
| Calcium Carbonate (40.04% Ca)             | 12.5                      | 12.3             | 12.5              |
| Sodium Phosphate, monobasic (25.81 % P)   | 5.6                       | 5.5              | 5.6               |
| Potassium Phosphate, monobasic (22.76% P) | 2.4                       | 2.4              | 2.4               |
| Sucrose                                   | 1.1                       | 1.3              | 1.1               |
| Choline Bitartrate                        | 2.5                       | 2.5              | 2.5               |
| L-cysteine                                | 1.8                       | 1.8              | 1.8               |

<sup>1</sup>TC (tart cherry) analysis performed by NP Analytical Laboratories (St Louis, MO).<sup>2</sup> Calcium and phosphorus deficient mineral mix (TD 98057 Envigo Laboratories) was used so that calcium and phosphorus could be adjusted for the TC diet.

**Supplementary Table 2: Primer Sequence List for qRT-PCRs**

| Symbol              | Name                                                | Sequence                                                                   |
|---------------------|-----------------------------------------------------|----------------------------------------------------------------------------|
| <i>Bmp2</i>         | Bone morphogenetic protein 2                        | QF 5'- GGACATCCGCTCCACAAA -3'<br>QR 5'- GGCGCTTCCGCTGTTT-3'                |
| <i>Bsp</i>          | Bone sialoprotein                                   | QF 5'- ACACCCCAAGCACAGACTTTTG -3'<br>QR 5'- TCCTCGTCGCTTTCCTTCACT -3'      |
| <i>Ccr7</i>         | C-C Motif Chemokine Receptor 7                      | QF 5'- GGTGGCTCTCCTTGTCATTTTC -3'<br>QR 5'- GTGGTATTCTCGCCGATGTAGTC -3'    |
| <i>Colla1</i>       | Type I collagen called the pro- $\alpha$ 1          | QF 5'- CGTCTGGTTTGGAGAGAGCAT -3'<br>QR 5'- GGTCAGCTGGATAGCGACATC -3'       |
| <i>Cx43</i>         | Connexin 43                                         | QF 5'- ACAGCGGTTGAGTCAGCTTG-3'<br>QR 5'- GAGAGATGGGAAGGACTTGT-3'           |
| <i>Cxc12</i>        | C-X-C Motif Chemokine Ligand 12                     | QF 5'- CAAGCATCTGAAAATCCTCAACAC -3'<br>QR 5'- TCTTCAGCCGTGCAACAATC -3'     |
| <i>Cxcl10</i>       | C-X-C Motif Chemokine Ligand 10                     | QF 5'- AGTGCTGCCGTCATTTTCTG -3'<br>QR 5'- ATTCTCACTGGCCCGTCAT-3'           |
| <i>Cxcr4</i>        | C-X-C Motif Chemokine Receptor 4                    | QF 5'- TCAGTGGCTGACCTCCTCTT -3'<br>QR 5'- CTTGGCCTTTGACTGTTGGT-3'          |
| <i>Dmp-1</i>        | Dentin matrix acidic phospho protein 1              | QF 5'- CTGTCATTCTCCTTGTGTTTCCT -3'<br>QR 5'- CAAATCACCCGTCCTCTCTTC -3'     |
| <i>Gapdh</i>        | Glucose 6 phosphate dehydrogenase                   | QF 5'- GAACGCAAAGCTGAAGTGAGACT -3'<br>QR 5'- TCATTACGCTTGCCTGTTGGT -3'     |
| <i>Gpr41</i>        | G protein-coupled receptor 41                       | QF 5'-TCCTGGCATCGGCTCACT -3'<br>QR 5'- TGTAGGTTGCATTTCCCCAGTA -3'          |
| <i>Gpr43</i>        | G protein-coupled receptor 43                       | QF 5'- TTCCCATGGCAGTCACCAT -3'<br>QR 5'- GGGCTGCGTGAGCATGAT -3'            |
| <i>Gpr109a</i>      | G protein-coupled receptor 109a                     | QF 5'- TCGAAAGAAAACATTGGGTGAA -3'<br>QR 5'- CCCCCTGAGCTCCACACT-3'          |
| <i>Hprt1</i>        | Hypoxanthine-guanine phosphoribosyl transferase     | QF 5'- GCCTAAGATGAGCGCAAGTTG -3'<br>QR 5'- TACTAGGCAGATGGCCACAGG -3'       |
| <i>Il6</i>          | Interleukin 6                                       | QF 5'- GAGGATACCACTCCCAACAGACC -3'<br>QR 5'- AAGTGCATCATCGTTGTTTCATACA -3' |
| <i>Il10</i>         | Interleukin 10                                      | QF 5'- GGTTGCCAAGCCTTATCGGA -3'<br>QR 5'- ACCTGCTCCACTGCCTTGCT -3'         |
| <i>Il17</i>         | Interleukin 17                                      | QF 5'- ATCCCTCAAAGCTCAGCGTGTC -3'<br>QR 5'- GGGTCTTCATTGCGGTGGAGAG-3'      |
| <i>Il22</i>         | Interleukin 22                                      | QF 5'- TGCCTTTCCTGACCAAACCTCA -3'<br>QR 5'- CTGGTCGTCACCGCTGATG -3'        |
| <i>Il23</i>         | Interleukin 23                                      | QF 5'- CGCCAAGGTCTGGCTTTTTTAT -3'<br>QR 5'- CAGGCTCCCCTTGAAGATG -3'        |
| <i>Mepe</i>         | Matrix extracellular phospho glycoprotein           | QF 5'- CCCCAGAGCAGCAAAGGTA -3'<br>QR 5'- CTCCGCTGTGACATCCCTTTA -3'         |
| <i>Ocn (Bglap2)</i> | Osteocalcin (Bone gamma-carboxyglutamate protein 2) | QF 5'- TGAGCTTAACCCTGCTTGTGACGA -3'<br>QR 5'- AGGGCAGCACAGGTCCTAAATAGT -3' |
| <i>Opg</i>          | Osteoprotegerin                                     | QF 5'- TCCCGAGGACCACAATGAAC -3'<br>QR 5'- TGGGTTGTCCATTCAATGATGT -3'       |
| <i>Opn</i>          | Osteopontin                                         | QF 5'- ACTCCAATCGTCCCTACAGTCG -3'<br>QR 5'- TGAGGTCCTCATCTGTGGCAT -3'      |
| <i>Osx</i>          | Osterix                                             | QF 5'- GAAGTTCACCTGCCTGCTCTGT -3'<br>QR 5'- CGTGGGTGCGCTGATGT -3'          |
| <i>Phex</i>         | Phosphate regulating endopeptidase X linked         | QF 5'- GGCATGACTGCTGTAAGATCAGAT -3'<br>QR 5'- AGCTCCATTGACATAAGGCACT -3'   |

|               |                                                        |                                                                          |
|---------------|--------------------------------------------------------|--------------------------------------------------------------------------|
| <i>Rankl</i>  | Receptor activator of nuclear factor kappa-B ligand    | QF 5'- TCTGCAGCATCGCTCTGTTC -3'<br>QR 5'- AGCAGTGAGTGCTGTCTTCTGATATT- 3' |
| <i>Runx2</i>  | Runt-related transcription factor 2                    | QF 5'- CGACAGTCCCAACTTCCTGT-3'<br>QR 5'- CGGTAACCACAGTCCCATCT -3'        |
| <i>Sost</i>   | Sclerostin                                             | QF 5'- ACCGGGCGGAGAATGG -3'<br>QR 5'- GCTGTACTCGGACACATCTTTGG -3'        |
| <i>Tgfb</i>   | Transforming growth factor beta                        | QF 5'- CCCTATATTTGGAGCCTGGA -3'<br>QR 5'- CTTGCGACCCACGTAGTAGA -3'       |
| <i>Tnfa</i>   | Tumor necrosis factor alpha                            | QF 5'- CTGAGGTCAATCTGCCCAAGTAC -3'<br>QR 5'- CTTACAGAGCAATGACTCCAAAG-3'  |
| <i>Vcam1</i>  | Vascular Cell Adhesion Molecule 1                      | QF 5'- TGAACCCAAACAGAGGCAGAGT -3'<br>QR 5'- GGTATCCCATCACTTGAGCAGG -3'   |
| <i>Wnt10b</i> | Wingless-type MMTV integration site family, member 10b | QF 5'- ATGCGGATCCACAACAACAG-3'<br>QR 5'- TTCCATGGCATTGCACTTC- 3'         |

**Supplementary Table 3:** Additional Trabecular and Cortical Bone Microarchitectural Parameters of the Lumbar Vertebra and Tibia

|                                  | Con           |               | TC                        |                           | FOS                         |                             | <i>P-values</i> |                 |           |
|----------------------------------|---------------|---------------|---------------------------|---------------------------|-----------------------------|-----------------------------|-----------------|-----------------|-----------|
|                                  | - CD25        | + CD25        | - CD25                    | + CD25                    | - CD25                      | + CD25                      | CD25            | Diet            | CD25*Diet |
| <b>Vertebra Trabecular Bone</b>  |               |               |                           |                           |                             |                             |                 |                 |           |
| TbN (1/mm <sup>2</sup> )         | 4.18 ± 0.07   | 4.29 ± 0.10   | 4.20 ± 0.08               | 4.46 ± 0.01               | 5.00 ± 0.07 <sup>#</sup>    | 4.97 ± 0.11 <sup>#</sup>    | 0.1238          | < <b>0.0001</b> | 0.2547    |
| TbTh (μm)                        | 51.58 ± 0.79  | 51.55 ± 1.04  | 49.36 ± 0.57 <sup>#</sup> | 49.95 ± 0.89 <sup>#</sup> | 55.08 ± 0.37 <sup>#</sup>   | 54.88 ± 0.91 <sup>#</sup>   | 0.8579          | < <b>0.0001</b> | 0.8764    |
| TbSp (μm)                        | 238.00 ± 4.35 | 230.38 ± 6.45 | 232.86 ± 4.47             | 222.88 ± 5.30             | 196.13 ± 3.44 <sup>#</sup>  | 198.63 ± 5.68 <sup>#</sup>  | 0.2317          | < <b>0.0001</b> | 0.2317    |
| ConnDens (1/mm <sup>3</sup> )    | 160.48 ± 7.66 | 164.89 ± 7.40 | 158.07 ± 5.37             | 187.15 ± 7.30             | 240.54 ± 9.97 <sup>#</sup>  | 241.51 ± 14.92 <sup>#</sup> | 0.1026          | < <b>0.0001</b> | 0.1414    |
| SMI                              | 1.28 ± 0.07   | 1.36 ± 0.06   | 1.46 ± 0.02 <sup>#</sup>  | 1.46 ± 0.07 <sup>#</sup>  | 0.73 ± 0.04 <sup>#</sup>    | 0.70 ± 0.09 <sup>#</sup>    | 0.8116          | < <b>0.0001</b> | 0.5710    |
| <b>Tibia Trabecular Bone</b>     |               |               |                           |                           |                             |                             |                 |                 |           |
| TbN (1/mm <sup>2</sup> )         | 3.84 ± 0.08   | 3.79 ± 0.13   | 3.76 ± 0.10               | 3.64 ± 0.09               | 4.39 ± 0.10 <sup>#</sup>    | 4.51 ± 0.08 <sup>#</sup>    | 0.8119          | < <b>0.0001</b> | 0.4473    |
| TbTh (μm)                        | 47.22 ± 0.68  | 45.19 ± 0.89  | 45.74 ± 1.31              | 45.40 ± 1.10              | 47.69 ± 0.64 <sup>\$</sup>  | 48.18 ± 0.65 <sup>\$</sup>  | 0.3937          | <b>0.0330</b>   | 0.3581    |
| TbSp (μm)                        | 255.43 ± 5.00 | 259.94 ± 9.18 | 261.88 ± 7.07             | 270.14 ± 6.88             | 219.78 ± 5.54 <sup>#</sup>  | 212.53 ± 3.98 <sup>#</sup>  | 0.7301          | < <b>0.0001</b> | 0.4665    |
| ConnDens (1/mm <sup>3</sup> )    | 81.73 ± 4.69  | 78.67 ± 7.40  | 93.10 ± 9.34              | 81.66 ± 6.02              | 145.96 ± 12.34 <sup>#</sup> | 154.87 ± 7.22 <sup>#</sup>  | 0.5925          | < <b>0.0001</b> | 0.4719    |
| SMI                              | 2.14 ± 0.10   | 2.17 ± 0.06   | 1.99 ± 0.09 <sup>#</sup>  | 1.97 ± 0.04 <sup>#</sup>  | 1.83 ± 0.08 <sup>#</sup>    | 1.80 ± 0.04 <sup>#</sup>    | 0.8420          | <b>0.0001</b>   | 0.9173    |
| <b>Tibia Cortical Bone</b>       |               |               |                           |                           |                             |                             |                 |                 |           |
| MedullaryArea (μm <sup>2</sup> ) | 28.1 ± 0.60   | 27.90 ± 0.80  | 27.7 ± 0.60               | 27.60 ± 1.10              | 30.9 ± 0.70 <sup>#</sup>    | 29.10 ± 0.70 <sup>#</sup>   | 0.3417          | <b>0.0076</b>   | 0.4884    |
| Porosity (%)                     | 3.88 ± 0.06   | 3.93 ± 0.11   | 3.93 ± 0.04               | 3.77 ± 0.12               | 4.1 ± 0.10                  | 4.07 ± 0.13                 | 0.2124          | 0.0809          | 0.7615    |

Control diet = Con; Tart cherry diet = TC; Fructooligosaccharide diet = FOS; Isotype control antibody = - CD25; CD25 antibody = +CD25.

Data presented as mean ± SE. n=8 mice/group. When only main effects of diet were detected, # indicates differences between TC or FOS diets vs. Con diet ( $P<0.05$ ).\$ indicated differences between TC vs. FOS diet groups ( $P<0.05$ ).

**Supplementary Table 4:** T- Lymphocyte Absolute Counts in Ileum and Bone Marrow

|                                                               | Con                      |                        | TC                     |                         | FOS                       |                           | <i>P-values</i> |                 |               |
|---------------------------------------------------------------|--------------------------|------------------------|------------------------|-------------------------|---------------------------|---------------------------|-----------------|-----------------|---------------|
|                                                               | - CD25                   | + CD25                 | - CD25                 | + CD25                  | - CD25                    | + CD25                    | CD25            | Diet            | CD25*Diet     |
| <b>Ileum T-Lymphocytes</b>                                    |                          |                        |                        |                         |                           |                           |                 |                 |               |
| CD3 <sup>+</sup> CD4 <sup>+</sup> (1 x10 <sup>3</sup> )       | 15.43 ± 3.42             | 27.00 ± 6.12           | 18.90 ± 3.32           | 18.17 ± 2.56            | 10.77 ± 1.27              | 14.84 ± 2.82              | 0.0743          | 0.1048          | 0.4038        |
| Treg (CD4 <sup>+</sup> CD25 <sup>+</sup> Foxp3 <sup>+</sup> ) | 431 ±102.31 <sup>b</sup> | 55 ±12 <sup>c</sup>    | 821 ± 129 <sup>a</sup> | 23 ± 7.01 <sup>d</sup>  | 457 ± 53 <sup>ab</sup>    | 26 ± 4.01 <sup>cd</sup>   | < <b>0.0001</b> | 0.8014          | <b>0.0030</b> |
| Th-17 (CD4 <sup>+</sup> IL-17 <sup>+</sup> )                  | 163 ± 40 <sup>b</sup>    | 223 ± 59 <sup>ab</sup> | 168 ± 48 <sup>b</sup>  | 87 ± 19.34 <sup>b</sup> | 126 ± 28 <sup>b</sup>     | 358 ± 44.98 <sup>a</sup>  | 0.0998          | 0.0848          | <b>0.0131</b> |
| <b>Bone Marrow T-Lymphocytes</b>                              |                          |                        |                        |                         |                           |                           |                 |                 |               |
| CD3 <sup>+</sup> CD4 <sup>+</sup> (1 x 10 <sup>3</sup> )      | 4.47 ± 0.85              | 3.40 ± 0.94            | 5.52 ± 1.16            | 3.79 ± 0.41             | 14.15 ± 1.10 <sup>#</sup> | 10.64 ± 0.92 <sup>#</sup> | <b>0.0391</b>   | < <b>0.0001</b> | 0.7621        |
| Treg (CD4 <sup>+</sup> CD25 <sup>+</sup> Foxp3 <sup>+</sup> ) | 886 ± 165                | 6.75 ± 3.74            | 788 ± 202              | 3.5 ± 1.43              | 2566 ± 121 <sup>#</sup>   | 11.83 ± 2.18 <sup>#</sup> | < <b>0.0001</b> | < <b>0.0001</b> | 0.2407        |
| Th-17 (CD4 <sup>+</sup> IL-17 <sup>+</sup> )                  | 60 ± 14                  | 61 ± 20                | 54 ±11.61              | 57 ± 15                 | 147 ± 26 <sup>#</sup>     | 163 ± 19.66 <sup>#</sup>  | 0.9469          | < <b>0.0001</b> | 0.6876        |

Control diet = Con; Tart cherry diet = TC; Fructooligosaccharide diet = FOS; Isotype control antibody = - CD25; CD25 antibody = +CD25.

Data presented as mean ± SE. n=8/group. Superscript letters note significant interactions (CD25\*Diet) and groups that share the same superscript letter are not significantly different from each other. When only main effects of diet were detected, # indicates differences between TC or FOS diets vs. Con diet ( $P<0.05$ ). \$ indicates differences between the TC vs. FOS diet groups ( $P<0.05$ ).

**Supplementary Table 5: Bone Gene Expression Data**

|                             | Con         |             | FOS         |             | <i>P-values</i> |        |           |
|-----------------------------|-------------|-------------|-------------|-------------|-----------------|--------|-----------|
|                             | - CD25      | + CD25      | - CD25      | + CD25      | CD25            | Diet   | CD25*Diet |
| <b>Osteoblastogenesis</b>   |             |             |             |             |                 |        |           |
| <i>Runx 2</i>               | 1.00 ± 0.14 | 1.38 ± 0.15 | 1.39 ± 0.17 | 1.12 ± 0.21 | 0.8852          | 0.5806 | 0.1806    |
| <b>Osteoblast Markers</b>   |             |             |             |             |                 |        |           |
| <i>Bsp</i>                  | 1.00 ± 0.23 | 1.10 ± 0.15 | 1.78 ± 0.31 | 0.93 ± 0.16 | 0.2121          | 0.4246 | 0.0923    |
| <i>Bglap2</i>               | 1.00 ± 0.18 | 1.59 ± 0.22 | 2.15 ± 0.38 | 1.87 ± 0.48 | 0.8661          | 0.0848 | 0.3625    |
| <i>Opn</i>                  | 1.00 ± 0.19 | 0.85 ± 0.15 | 1.52 ± 0.23 | 0.93 ± 0.18 | 0.1563          | 0.2700 | 0.3641    |
| <b>Rank: Rankl:Opg Axis</b> |             |             |             |             |                 |        |           |
| <i>RankL</i>                | 1.00 ± 0.16 | 0.91 ± 0.1  | 0.90 ± 0.22 | 0.81 ± 0.12 | 0.7798          | 0.1754 | 0.8669    |
| <i>Opg</i>                  | 1.00 ± 0.11 | 0.74 ± 0.17 | 1.01 ± 0.27 | 0.73 ± 0.12 | 0.3621          | 0.8459 | 0.3917    |
| <i>RankL:Opg</i>            | 1.00 ± 0.27 | 1.48 ± 0.37 | 0.72 ± 0.06 | 1.63 ± 0.15 | 0.0820          | 0.2180 | 0.4943    |

Control diet = Con; Fructooligosaccharide diet = FOS; Isotype control antibody = - CD25; CD25 antibody = +CD25.

Data presented as mean ± SE. n=6/group

### Supplementary Figure 1.

Representative 3-D images generated from microCT scans of the (A) lumbar vertebral body and (B) midshaft of the tibia. Control diet = Con; Tart cherry diet = TC; Fructo-oligosaccharide diet = FOS; Isotype control antibody = -CD25; CD25 antibody = +CD25.

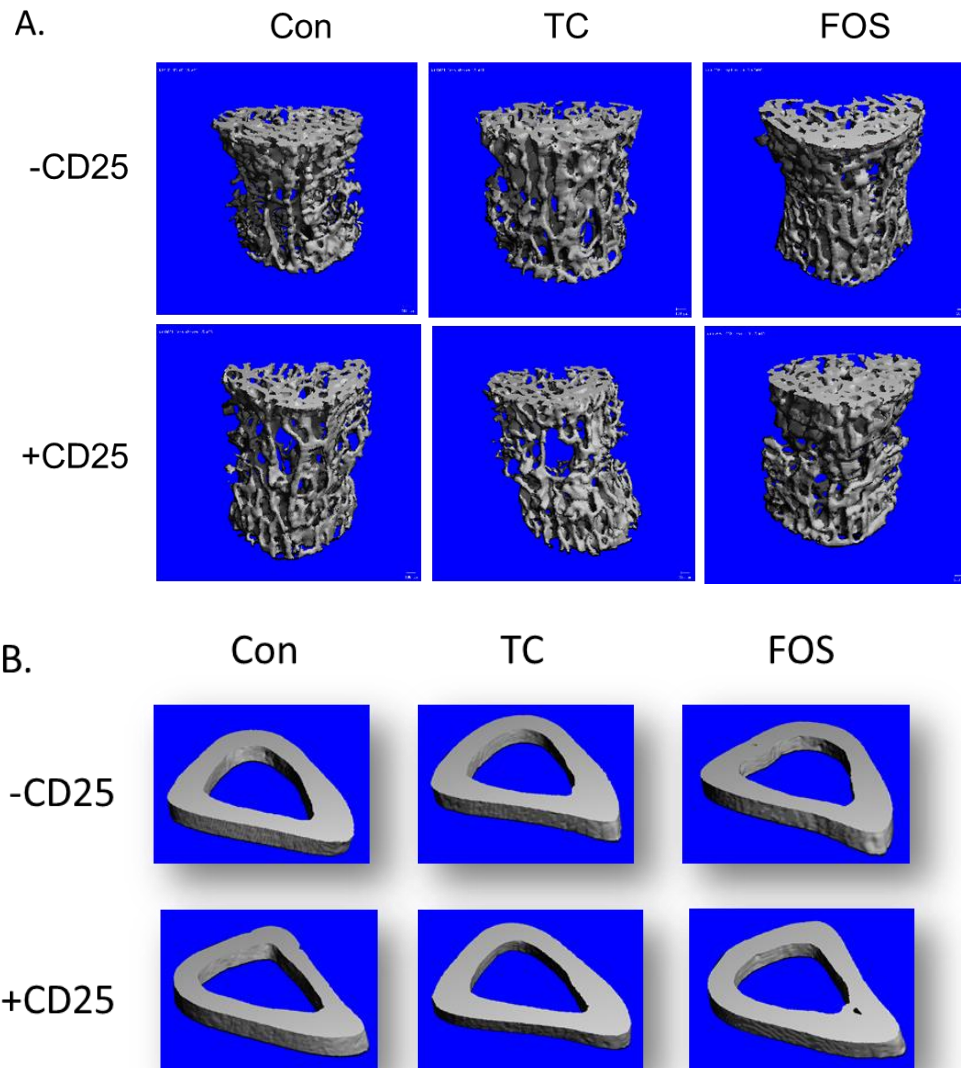

Supplement: supporting_information_for_publication_ziae021.pdf [file supporting_information_for_publication_ziae021.pdf]
